# Supplementary material
Source: PubMed Central journal article supplement (PMC3656602)
Supplement: NIHMS464332-supplement-Suppl_Table1.pdf [file NIHMS464332-supplement-Suppl_Table1.pdf]

**Supplemental Table 1. Outcome of the comparative phosphosite screening<sup>1</sup>**

| Signalling component <sup>2</sup>                               | Epitope(s)         | + NG2           | - NG2             | Equal <sup>3</sup> |
|-----------------------------------------------------------------|--------------------|-----------------|-------------------|--------------------|
| Adducin $\alpha$ (122 kDa)                                      | S724               |                 |                   | 1.49               |
| Adducin $\gamma$ (81 kDa)                                       | S662               |                 |                   | 1.04               |
| B23 (nucleophosmin) S4                                          | S4                 | ND <sup>4</sup> | ND                | ND                 |
| c-Met Receptor Tyrosine Kinase                                  | Y1003              | ND              | ND                | ND                 |
| c-Met Receptor Tyrosine Kinase                                  | Y1230/Y1234/Y1235  | ND              | ND                | ND                 |
| CREB (44 kDa)                                                   | S133               |                 |                   | 1.18               |
| c-Jun                                                           | S73                |                 | De-phosphorylated |                    |
| Cyclin-dependent kinase 1/2 (CDK1/2; 28 kDa)                    | T14 + Y15          |                 | 2.07              |                    |
| eIF-2a (35 kDa)                                                 | S52                |                 |                   | 1.09               |
| eIF-2 Be                                                        | S539               | ND              | ND                | ND                 |
| eIF-4                                                           | S209               | ND              | ND                | ND                 |
| ERK-1                                                           | T202 + Y204        |                 | De-phosphorylated |                    |
| ERK-2 (40 kDa)                                                  | T185 + Y187        |                 | 11.13             |                    |
| ERK5                                                            | T218 + Y220        | ND              | ND                | ND                 |
| FAK                                                             | Y576               | ND              | ND                | ND                 |
| G protein-coupled receptor kinase-2 (GRK2; 73 kDa)              | S670               | 2.09            |                   |                    |
| GSK3 $\alpha$ (44 kDa)                                          | S21                |                 |                   | 1.28               |
| GSK3 $\alpha$ (45 kDa)                                          | Y279               | ND              | ND                | ND                 |
| GSK3 $\beta$ (41 kDa)                                           | Y216               |                 |                   | 1.2                |
| GSK3 $\beta$                                                    | S9                 | ND              | ND                | ND                 |
| Lck                                                             | Y505               | ND              | ND                | ND                 |
| MAPK/ERK protein-serine kinase 1                                | S297               | ND              | 2.31              | ND                 |
| MAPK/ERK protein-serine kinase 1 (MEK1; 42 kDa)                 | T292               |                 |                   | 1.09               |
| MAPK/ERK protein-serine kinase 1 (MEK1)                         | S217 + S221        |                 | De-phosphorylated |                    |
| MAPK/ERK protein-serine kinase 2 (MEK2; 44 kDa)                 | T394               |                 |                   | 1.22               |
| MAPK/ERK protein-serine kinase 3 (MEK3)                         | S189               |                 | De-phosphorylated |                    |
| MAPK/ERK protein-serine kinase 6 (MEK6)                         | S207               |                 | De-phosphorylated |                    |
| Mitogen-and stress-activated protein kinase 1 (MSK1; 79 kDa)    | S376               |                 |                   | 1.48               |
| Mixed-lineage kinase-3 (Mlk-3; 150 kDa)                         | T277 + S281        | Phosphorylated  |                   |                    |
| N-methyl-D-aspartate glutamate receptor 1 subunit $\zeta$ (NR1) | S896               | ND              | ND                | ND                 |
| p21-activated kinases 1/2/3 (PAK1/2/3)                          | S144 + S141 + S139 |                 |                   | 1.3                |
| p38 $\alpha$ MAPK (39 kDa)                                      | T180 + Y182        |                 | 3.98              |                    |
| Paxillin                                                        | Y118               | ND              | ND                | ND                 |
| Paxillin                                                        | Y31                | ND              | ND                | ND                 |
| PKB $\alpha$ /Akt1 (56 kDa)                                     | T308               |                 | 1.74              |                    |
| PKB $\alpha$ /Akt1 (58 kDa)                                     | S473               |                 | 4.39              |                    |
| PKC $\alpha$ (81 kDa)                                           | S657               |                 |                   | 1.10               |
| PKC $\alpha$ / $\beta$ 2 (79 kDa)                               | T638 + T641        |                 | 2.87              |                    |
| PKC $\delta$ (73 kDa)                                           | T505               |                 |                   | 1.08               |
| PKC $\epsilon$ (93 kDa)                                         | S729               |                 |                   | 1.35               |
| PKR1 (70 kDa)                                                   | T451               | 3.49            |                   |                    |
| PTK-2                                                           | Y579               | ND              | ND                | ND                 |
| Raf 1 (61 kDa)                                                  | S259               |                 | 2.11              |                    |
| Raf 1 (65 kDa)                                                  | S259               |                 | 2.14              |                    |
| Retinoblastoma protein (Rb)                                     | T821               | ND              | ND                | ND                 |
| Retinoblastoma protein (Rb; 121 kDa)                            | S780               |                 |                   | 1.41               |
| Retinoblastoma protein (Rb; 127 kDa)                            | T356               | 1,86            |                   |                    |
| Retinoblastoma protein (Rb; 124 kDa)                            | T826               |                 |                   | 1.12               |
| Retinoblastoma protein (Rb; 118 kDa)                            | S612               |                 | 2.09              |                    |
| Retinoblastoma protein (Rb; 113 kDa)                            | S807 + S811        |                 | 3.22              |                    |
| RSK1/2                                                          | T359 + S363        | ND              | ND                | ND                 |
| S6 kinase p70 (S6K $\alpha$ ; 79 kDa)                           | T389               | 1.56            |                   |                    |
| SMADs1/5/9                                                      | S463 + S465        | ND              | ND                | ND                 |
| Shc (50 kDa)                                                    | Y239 + Y240        |                 | 2.32              |                    |
| Src (51 kDa)                                                    | Y529               |                 | 2.85              |                    |
| Src                                                             | Y418               | ND              | 1.72              | ND                 |
| STAT1 (92 kDa)                                                  | S701               |                 |                   | 1.14               |
| STAT3 (82 kDa)                                                  | S727               |                 |                   | 1.19               |
| STAT5                                                           | Y694               | ND              | ND                | ND                 |
| JNK (41 kDa)                                                    | T183 + Y185        |                 | De-phosphorylated |                    |
| JNK (48 kDa)                                                    | T183 + Y185        |                 | 1.71              |                    |
| p53                                                             | S392               | ND              | ND                | 1.21               |

<sup>1</sup>Values refer to the fold difference in phosphorylation degree of the indicated components, when comparing siRNA-treated (- NG2) versus untreated (+ NG2) cells after stimulation with FGF-2 through a semi-quantitative multi-blotting procedure (Pelech, S., Sutter, C., & Zhang, H. Kinetworks protein kinase multiblot analysis. *Methods Mol. Biol.* **218**, 99-111; 2003). Difference between the two samples was established at an arbitrary cut-off of 1.5-fold.

<sup>2</sup>The apparent MW at which the component was detected in the blots is indicated within brackets.

<sup>3</sup>“Equal”, no difference in phosphorylation degree according to the cut-off setting.

<sup>4</sup>ND, no phosphorylation of the component was detectable.

<sup>5</sup>“Phosphorylation” for Mlk3 means that the component was phosphorylated in NG2-expressing cells, but was entirely de-phosphorylated in NG2-deficient cells (i.e. it was not possible to retrieve a numerical value for the comparison)..
